# Supplementary material for: Evaluating the Psychometric Properties of the Kannada Version of EAT 10
Source: Springer Nature journal article supplement (doi:10.1007/s00455-020-10094-2), 2020-02-08
Supplement: MOESM1 [file 17662286]

|  | | | | | | | | |
| --- | --- | --- | --- | --- | --- | --- | --- | --- |
| ಸೂಕ್ತವಾದ ಪ್ರತಿಕ್ರಿಯೆಯನ್ನು ಸೂಚಿಸಿ | | | | | | |
| ಈ ಕೆಳಗಿನ ಸನ್ನಿವೇಶಗಳು ನಿಮಗೆ ಎಷ್ಟರ ಮಟ್ಟಿಗೆ ಸಮಸ್ಯೆಯಾಗಿವೆ? | | 0 = ಸಮಸ್ಯೆಯೇ ಇಲ್ಲ | | | 4=ತೀವ್ರ ಸಮಸ್ಯೆ | | |
| 1 | ನುಂಗುವ ಸಮಸ್ಯೆಯಿಂದಾಗಿ ನನ್ನ ತೂಕ ಕಡಿಮೆಯಾಗಿದೆ. | 0 | 1 | 2 | 3 | 4 | |
| 2 | ನಾನು ಹೊರ ತಿನ್ನುವ ಸಾಮರ್ಥ್ಯಕ್ಕೆ ನನ್ನ ನುಂಗುವ ಸಮಸ್ಯೆಯು ಅಡಚಣೆಯಾಗಿದೆ. | 0 | 1 | 2 | 3 | 4 | |
| 3 | ದ್ರವ ಪದಾರ್ಥಗಳನ್ನು ನುಂಗಲು ಹೆಚ್ಚು ಶ್ರಮ ಪಡಬೇಕಾಗತ್ತದೆ. | 0 | 1 | 2 | 3 | 4 | |
| 4 | ಗಟ್ಟಿ ಪದಾರ್ಥಗಳನ್ನು ನುಂಗಲು ಹೆಚ್ಚು ಶ್ರಮ ಪಡಬೇಕಾಗತ್ತದೆ. | 0 | 1 | 2 | 3 | 4 | |
| 5 | ಮಾತ್ರೆ / ಔಷಧಗಳನ್ನು ನುಂಗಲು ಹೆಚ್ಚು ಶ್ರಮ ಪಡಬೇಕಾಗತ್ತದೆ. | 0 | 1 | 2 | 3 | 4 | |
| 6 | ನುಂಗುವಾಗ ನನಗೆ ನೋವಾಗುತ್ತದೆ. | 0 | 1 | 2 | 3 | 4 | |
| 7 | ನುಂಗುವ ಸಮಸ್ಯೆಯಿಂದಾಗಿ ಅನ್ನ ಆಹಾರಗಳನ್ನು ಸೇವಿಸುವುದು ಅಷ್ಟು ಹಿತಕರವಾಗಿಲ್ಲ. | 0 | 1 | 2 | 3 | 4 | |
| 8 | ನುಂಗಿದಾಗ ಊಟ ಗಂಟಲಿನಲ್ಲೆ ಉಳಿಯುತ್ತದೆ. | 0 | 1 | 2 | 3 | 4 | |
| 9 | ನಾನು ಅನ್ನ ಆಹಾರಗಳನ್ನು ತಿಂದಾಗ ಕೆಮ್ಮುತ್ತೇನೆ. | 0 | 1 | 2 | 3 | 4 | |
| 10 | ನುಂಗುವುದು ಒತ್ತಡಕರವೆನಿಸುತ್ತದೆ. | 0 | 1 | 2 | 3 | 4 | |
|  | ಒಟ್ಟು EAT 10 |  |  |  |  |  | |
